# Supplementary material for: Fabrication of reversible pH-responsive aggregation-induced emission luminogens assisted by a block copolymer via a dynamic covalent bond
Source: Royal Society of Chemistry journal article supplement (doi:10.1039/d1py00312g), 2021-01-01
Supplement: d1py00312g1.pdf [file d1py00312g1.pdf]

## Electronic Supplementary Material (ESI)

### **Fabrication of reversible pH-responsive aggregation- induced emission luminogen assisted by a block copolymer *via* a dynamic covalent bond**

Meiyao Wang<sup>†,#</sup>, Lili Xu<sup>†,#</sup>, Min Lin<sup>†</sup>, Zhibo Li<sup>†,‡,\*</sup>, Jing Sun<sup>†,\*</sup>

<sup>†</sup>Key Laboratory of Biobased Polymer Materials, Shandong Provincial Education  
Department; School of Polymer Science and Engineering, Qingdao University of  
Science and Technology, Qingdao, 266042, China

<sup>‡</sup>College of Chemical Engineering, Qingdao University of Science and Technology,  
Qingdao, 266042, China

**Scheme S1.** Synthetic Route of TPE-CHO.

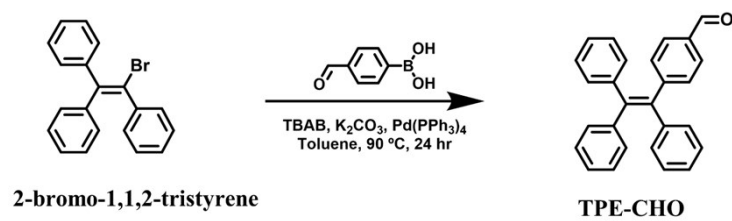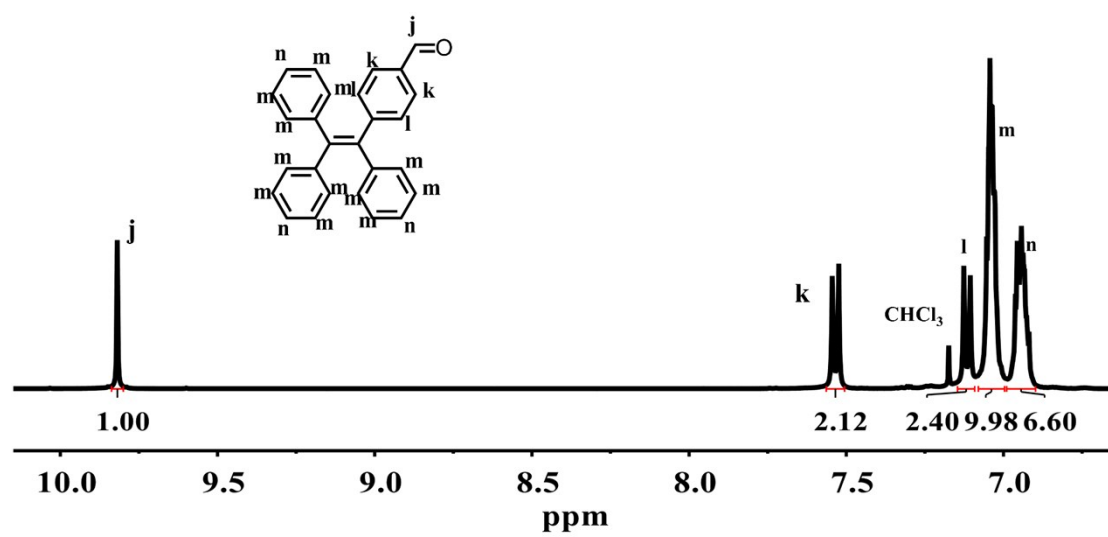

**Figure S1.** <sup>1</sup>H NMR spectrum for TPE-CHO in CDCl<sub>3</sub>.

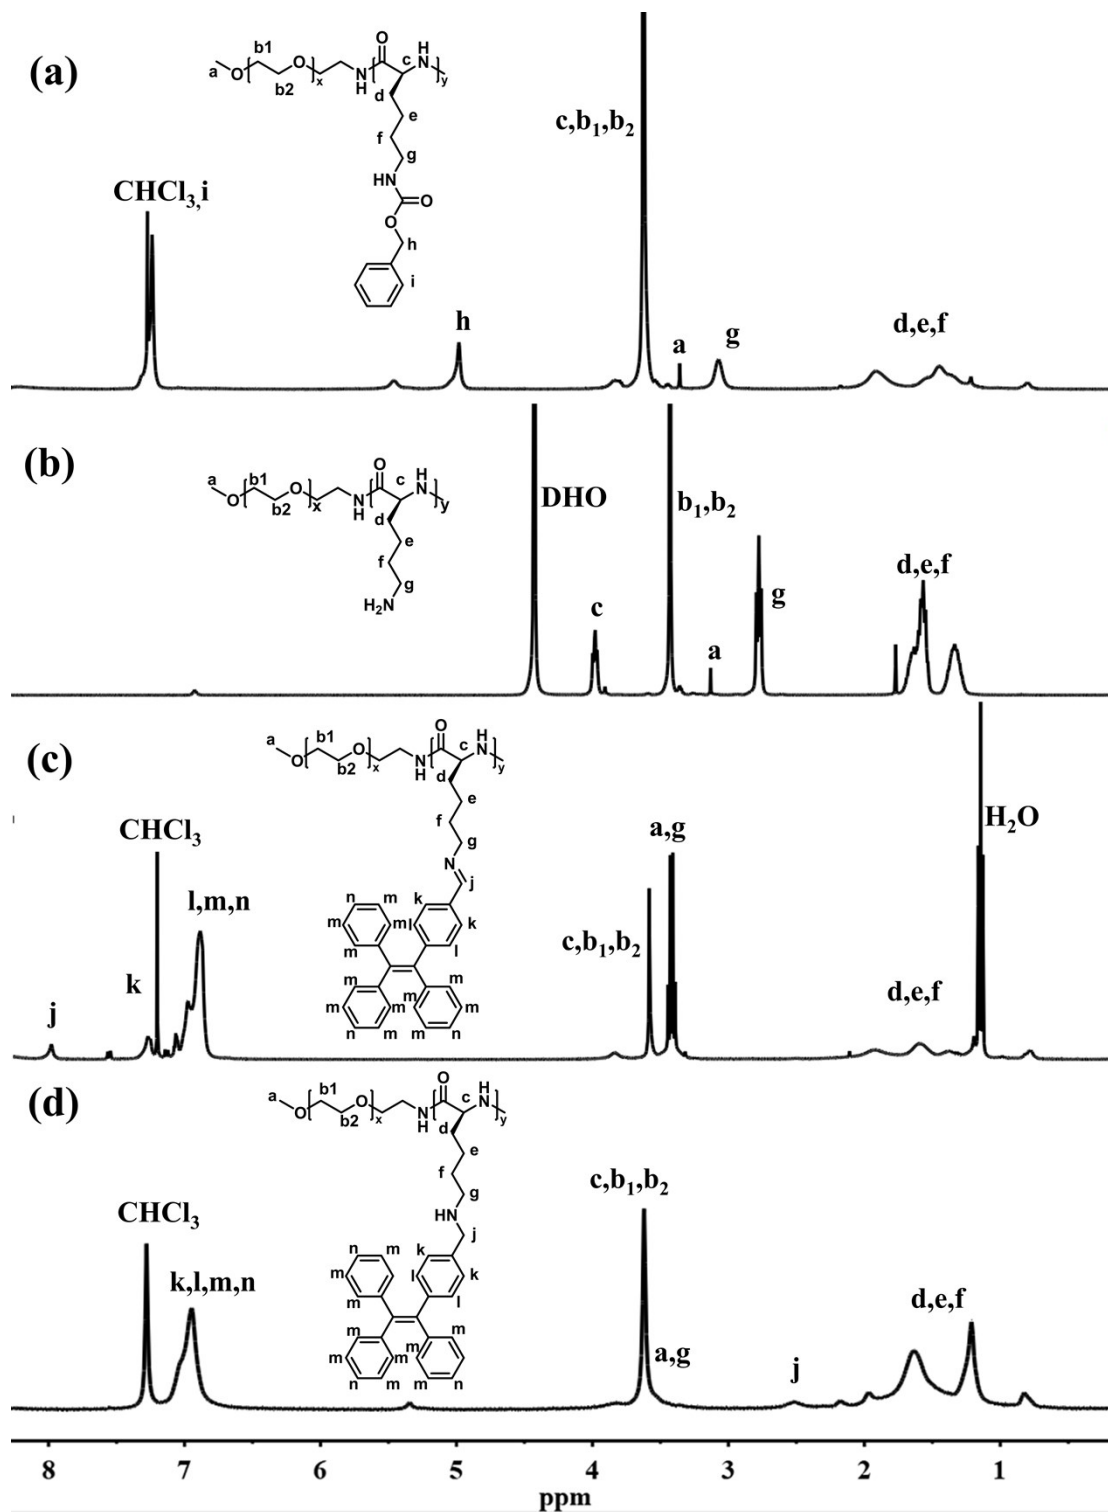

**Figure S2.**  $^1\text{H}$  NMR spectra for (a) PEG<sub>x</sub>-b-PZLyS<sub>y</sub> in CDCl<sub>3</sub>; (b) PEG<sub>x</sub>-b-PLyS<sub>y</sub> in D<sub>2</sub>O; (c) PEG<sub>x</sub>-b-P(Lys-TPE)<sub>y</sub> in CDCl<sub>3</sub> and (d) H-PEG<sub>x</sub>-b-P(Lys-TPE)<sub>y</sub> in CDCl<sub>3</sub>.

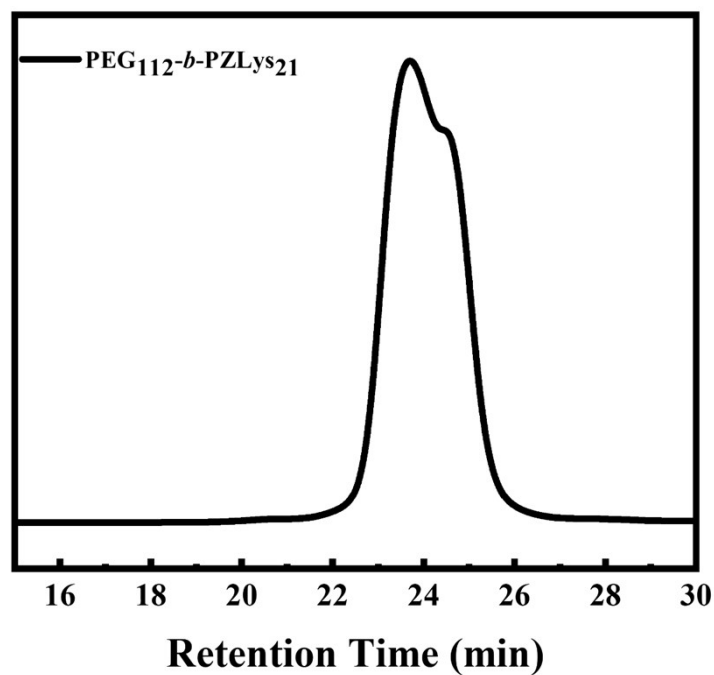

**Figure S3.** GPC chromatogram of the PEG<sub>112</sub>-*b*-PZLys<sub>21</sub>.

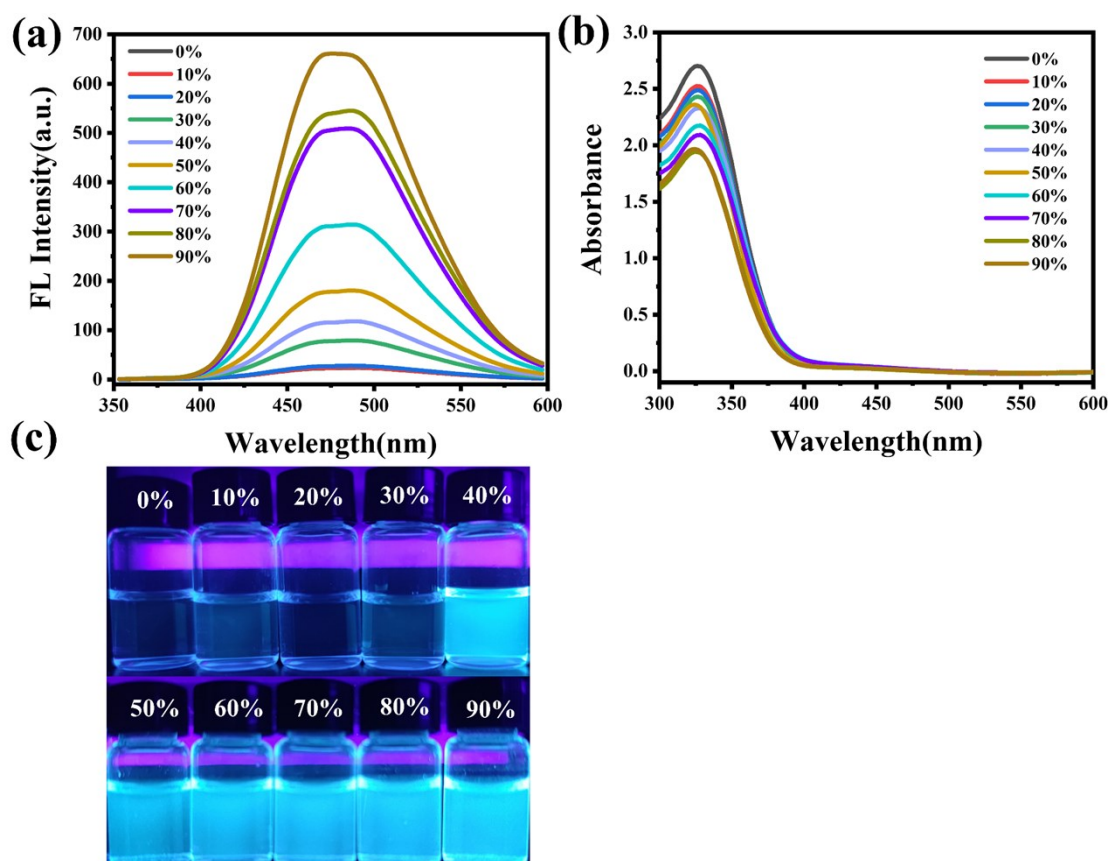

**Figure S4.** The fluorescence spectra ( $\lambda_{\text{ex}} = 330 \text{ nm}$ ) (a), UV absorption spectra (b) and digital photos (c) under a hand-held UV-lamp ( $\lambda_{\text{max}} = 365 \text{ nm}$ ) for H-PEG<sub>112</sub>-*b*-P(Lys-TPE)<sub>21</sub> in H<sub>2</sub>O/DMF mixtures at a concentration of 0.1 mg/mL by changing water fraction from 0% to 90%.

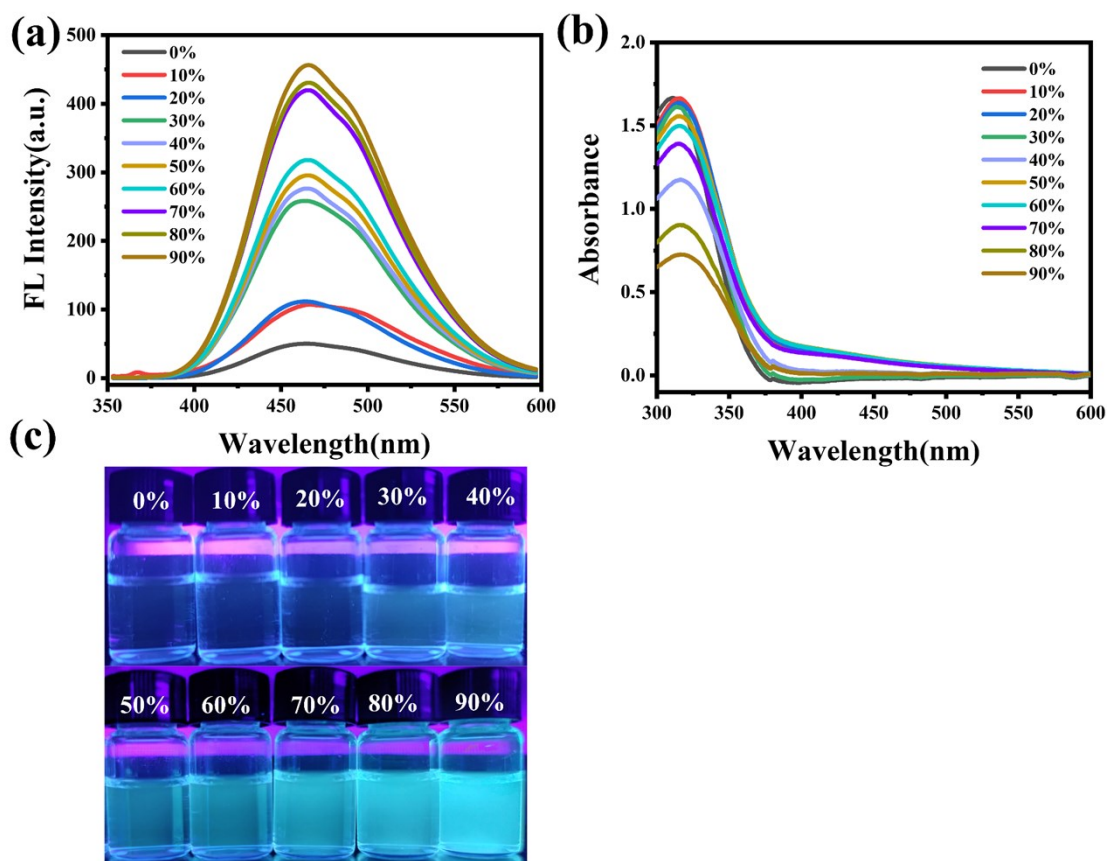

**Figure S5.** The fluorescence spectra ( $\lambda_{\text{ex}} = 330 \text{ nm}$ ) (a), UV absorption spectra (b) and digital photos (c) under a hand-held UV-lamp ( $\lambda_{\text{max}} = 365 \text{ nm}$ ) for  $\text{PEG}_{112}\text{-}b\text{-P(Lys-TPE)}_{21}$  in THF/ $\text{H}_2\text{O}$  mixtures at a concentration of  $0.1 \text{ mg/mL}$  by changing water fraction from 0% to 90%.

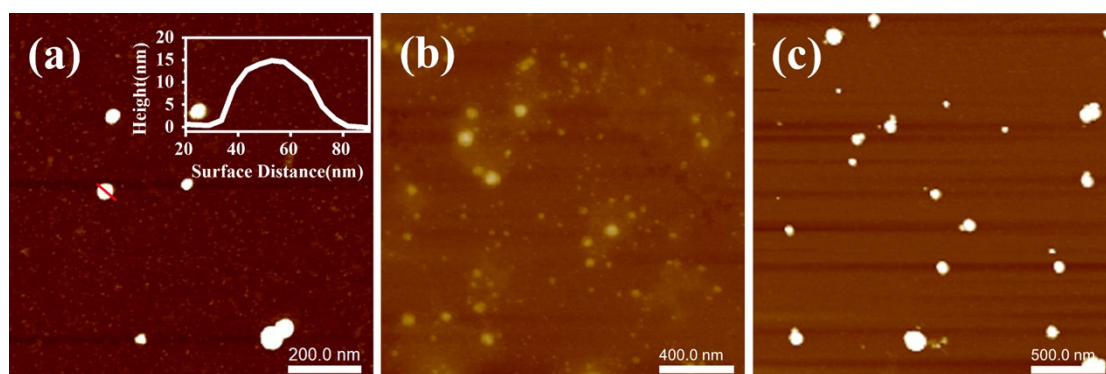

**Figure S6.** AFM images for  $\text{PEG}_{112}\text{-}b\text{-P(Lys-TPE)}_{21}$  ( $0.1 \text{ mg/mL}$ ) in water content of 10% (a), 20% (b) and 90% (c) in DMF solution.

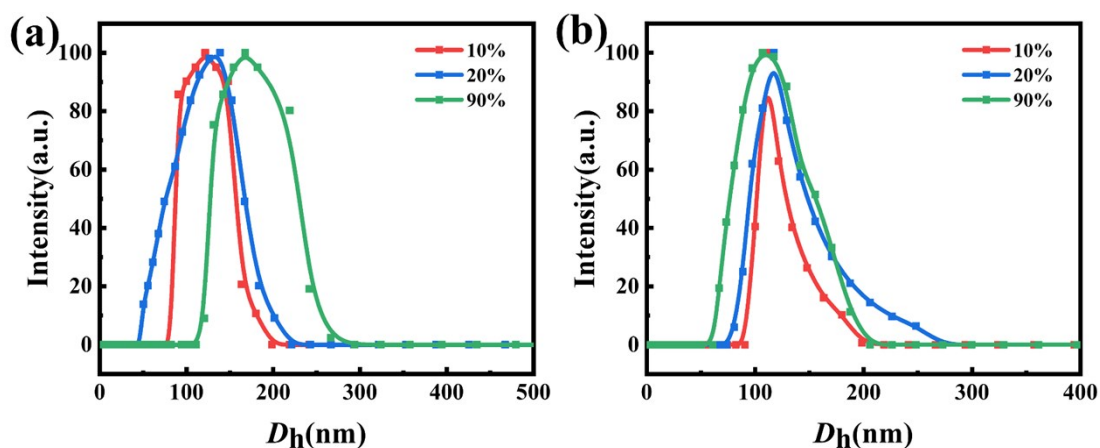

**Figure S7.** The  $D_h$  distributions of self-assembled PEG<sub>112</sub>-*b*-P(Lys-TPE)<sub>21</sub> (0.1 mg/mL) in mixed solvents of H<sub>2</sub>O/DMF with the volume ratio of water in mixture: 10%, 20% and 90% (a), in mixed solvents of H<sub>2</sub>O/THF with the volume ratio of water in mixture: 10%, 20% and 90% (b).

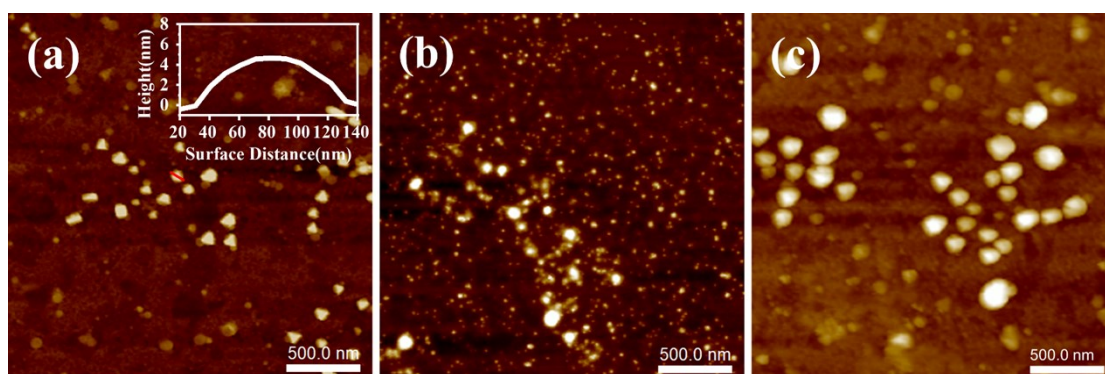

**Figure S8.** AFM images for PEG<sub>112</sub>-*b*-P(Lys-TPE)<sub>21</sub> (0.1 mg/mL) in water content of 10% (a), 20% (b) and 90% (c) in THF solution.

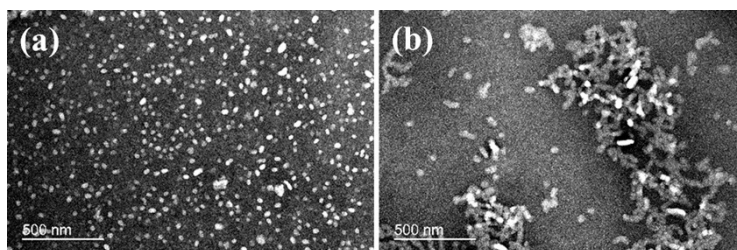

**Figure S9.** TEM images for H-PEG<sub>112</sub>-*b*-P(Lys-TPE)<sub>21</sub> (0.1 mg/mL) in 10% water content (a), in 90% water content (b) DMF/ H<sub>2</sub>O mixed solution.

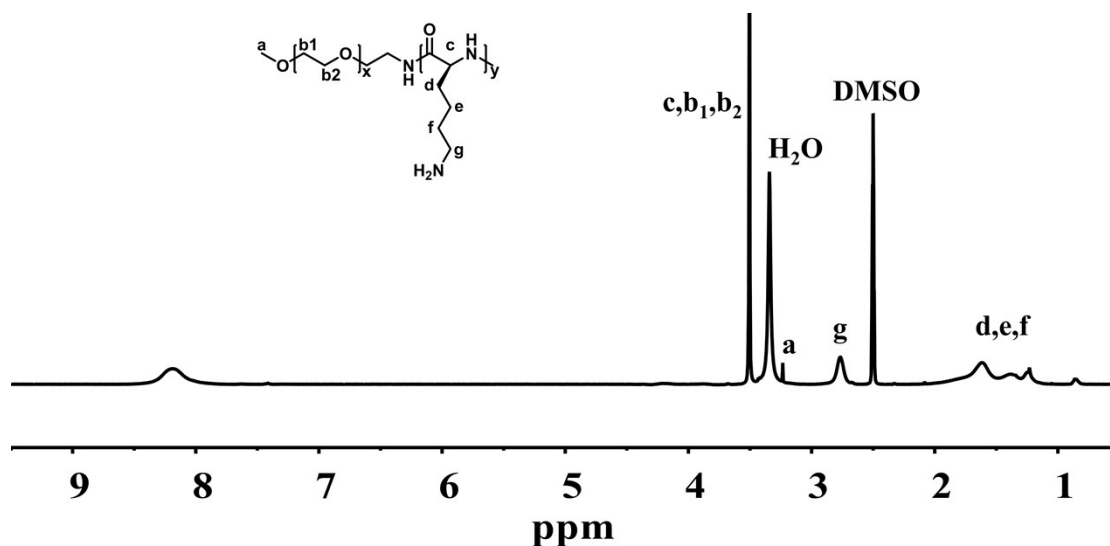

**Figure S10.**  $^1\text{H}$ NMR spectrum of the sample collected from  $\text{PEG}_x\text{-}b\text{-P(Lys-TPE)}_y$  solution after adding solution at pH 1.4 in DMSO.

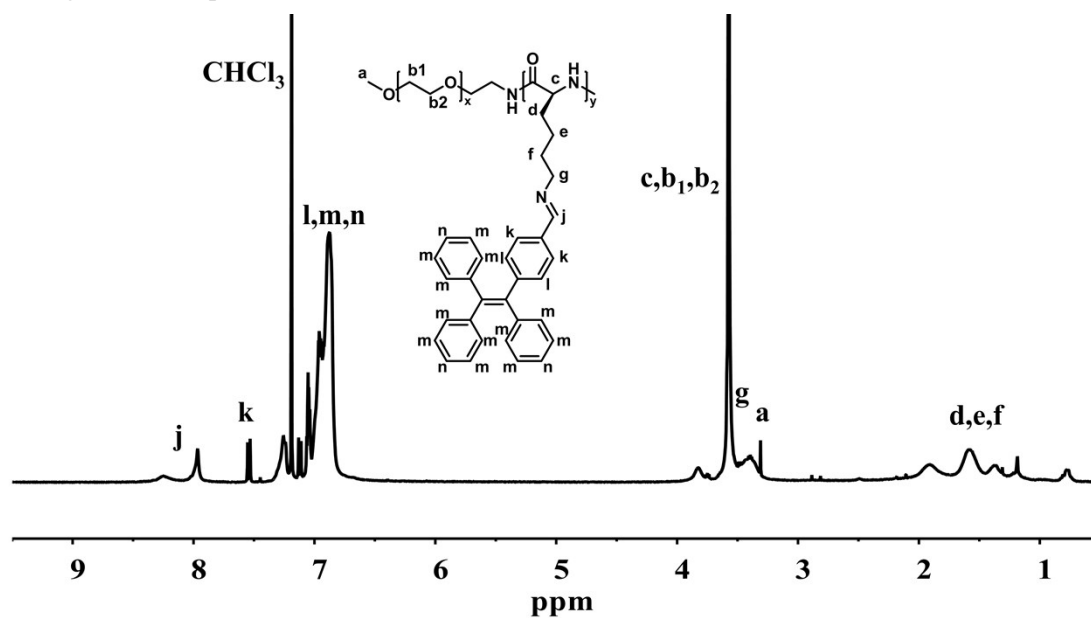

**Figure S11.**  $^1\text{H}$ NMR spectrum of the sample collected from  $\text{PEG}_x\text{-}b\text{-P(Lys-TPE)}_y$  solution after sequentially adding solution at pH 1.4 and 12.6 in  $\text{CDCl}_3$ .

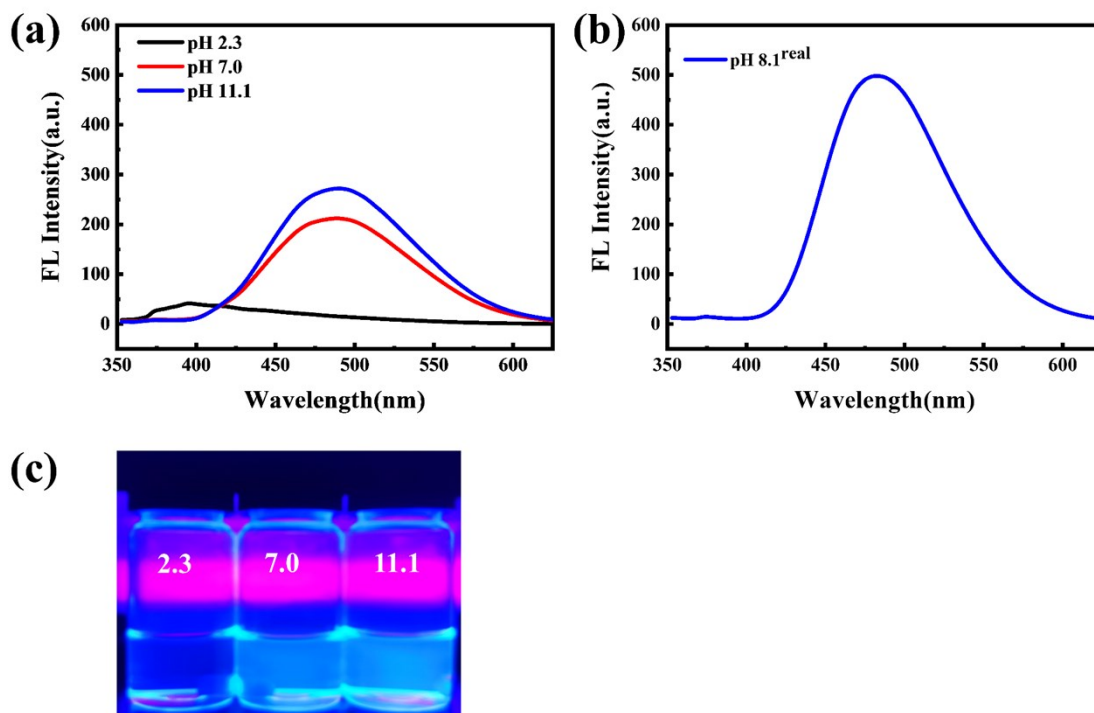

**Figure S12.** FL spectra ( $\lambda_{\text{ex}} = 330 \text{ nm}$ ) for  $\text{PEG}_{112}\text{-}b\text{-P(Lys-TPE)}_{21}$  solutions with addition of aqueous solution at different pH ( $v_{\text{THF}}:v_{\text{H}_2\text{O}} = 9:1$ ,  $0.1 \text{ mg/mL}$ ) (a), the mixture with addition of solution at pH 2.3, followed by adding solution at pH 11.7 with stirring (the solution pH value is determined to be  $\sim 8.1$  after THF evaporation) (b), and digital photos under a hand-held UV-lamp ( $\lambda_{\text{max}} = 365 \text{ nm}$ ) for  $\text{PEG}_{112}\text{-}b\text{-P(Lys-TPE)}_{21}$  solutions with addition of aqueous solution at different pHs ( $v_{\text{THF}}:v_{\text{H}_2\text{O}} = 9:1$ ,  $0.1 \text{ mg/mL}$ ) (c).

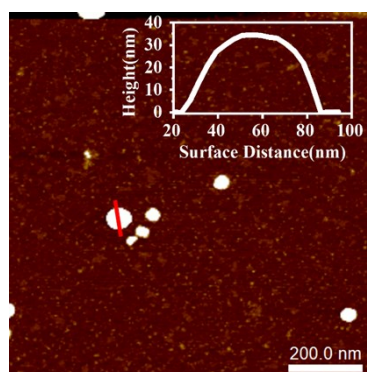

**Figure S13.** AFM image for  $\text{PEG}_{112}\text{-}b\text{-P(Lys-TPE)}_{21}$  in DMF/H<sub>2</sub>O mixture solvent ( $v:v = 9:1$ ,  $0.1 \text{ mg/mL}$ ) with addition of solution at pH 1.4, followed by adding solution at pH 12.6 with stirring.



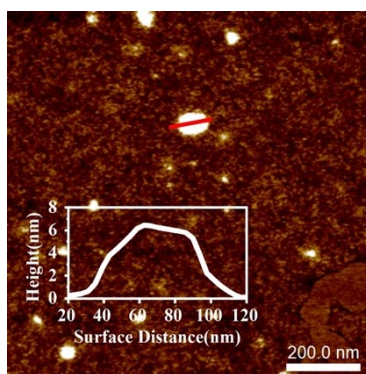

**Figure S14.** AFM image for PEG<sub>112</sub>-*b*-P(Lys-TPE)<sub>21</sub> with addition of aqueous solution at pH 2.3 ( $v_{\text{THF}}:v_{\text{H}_2\text{O}} = 9:1$ , 0.1 mg/mL) followed by adding solution at pH 11.7 with stirring (the solution pH value is determined to be  $\sim 8.1$  after THF evaporation).

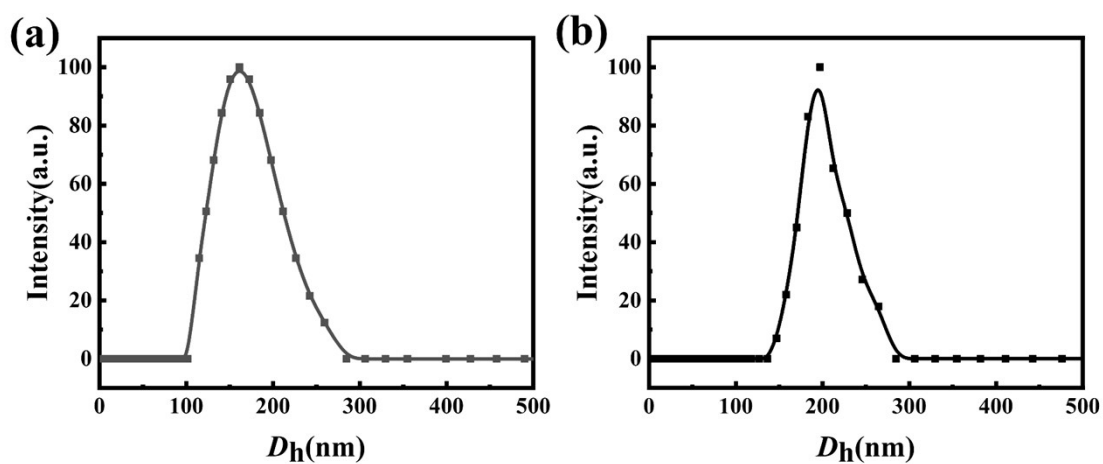

**Figure S15.** The  $D_h$  distributions for PEG<sub>112</sub>-*b*-P(Lys-TPE)<sub>21</sub> solution with addition of aqueous solution at pH 1.4 ( $v_{\text{DMF}}:v_{\text{H}_2\text{O}} = 9:1$ , 0.1 mg/mL), followed by adding solution at pH 12.6 with stirring (a) and PEG<sub>112</sub>-*b*-P(Lys-TPE)<sub>21</sub> solution with addition of aqueous solution at pH 2.3 ( $v_{\text{THF}}:v_{\text{H}_2\text{O}} = 9:1$ , 0.1 mg/mL), followed by adding solution at pH 11.7 with stirring (b) (the solution pH value is determined to be  $\sim 8.1$  after THF evaporation).

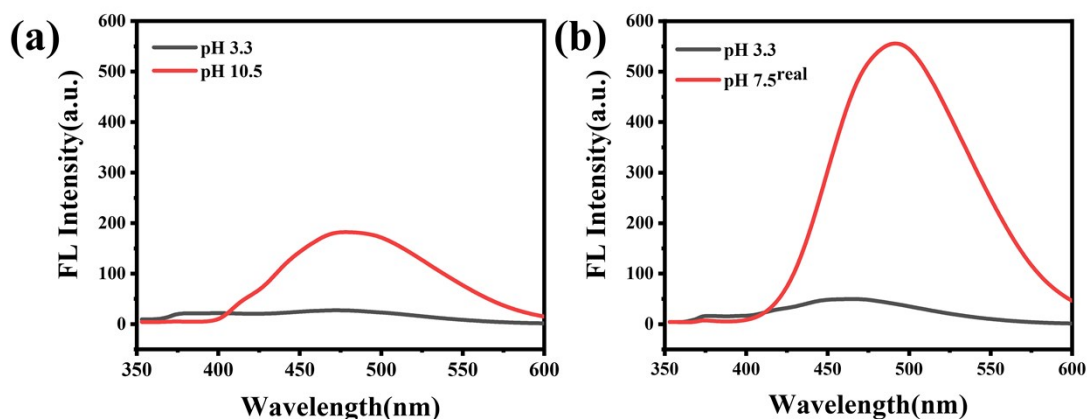

**Figure S16.** FL spectra ( $\lambda_{\text{ex}} = 330 \text{ nm}$ ) for  $\text{PEG}_{112}\text{-}b\text{-P(Lys-TPE)}_{21}$  solutions with addition of solution at pH 3.3, followed by adding solution at pH 10.5 with stirring in DMF/ $\text{H}_2\text{O}$  mixture ( $v : v = 9:1$ , 0.1 mg/mL) (a), and with addition of solution at pH 3.3, followed by adding basic solution with stirring in THF/ $\text{H}_2\text{O}$  mixture ( $v : v = 9:1$ , 0.1 mg/mL) (the solution pH value is determined to be  $\sim 7.5$  after THF evaporation) (b).

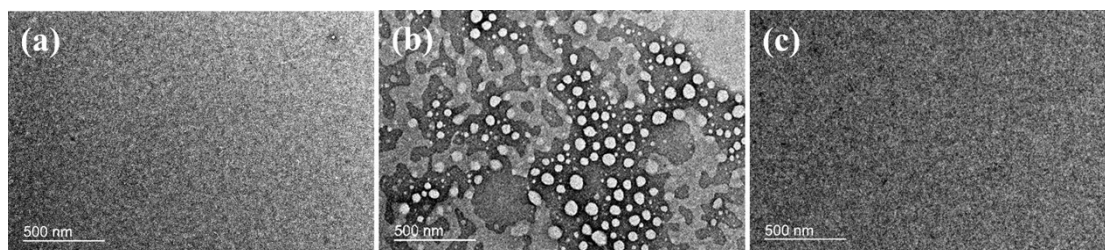

**Figure S17.** TEM images for  $\text{PEG}_{112}\text{-}b\text{-P(Lys-TPE)}_{21}$  (0.1 mg/mL) in aqueous solution at pH of 3.5 (a), 7.0 (b) and 11.4 (c).

**Table S1.** Molecular parameters of diblock copolymers.

| samples                                       | Feed ratio <sup>a</sup><br>(NCA/initiator) | $n^b$ | $M_n^b$<br>(kg/mol) | $M_n^c$<br>(kg/mol) | Dispersity <sup>c</sup><br>( $\mathcal{D}$ ) |
|-----------------------------------------------|--------------------------------------------|-------|---------------------|---------------------|----------------------------------------------|
| $\text{PEG}_{112}\text{-}b\text{-PZLyS}_{21}$ | 20/1                                       | 21    | 10.5                | 13.5                | 1.13                                         |

<sup>a</sup>Feed molar ratio of NCA/initiator. <sup>b</sup>Calculated from the proton integral ratios of allyl group or propargyl group to the phenyl group by  $^1\text{H}$  NMR spectra. <sup>c</sup>Determined from GPC;  $n$  represents the average DP of  $\text{PEG}_{112}\text{-}b\text{-PZLyS}_{21}$ .
